# Supplementary material for: Infographic summaries for clinical practice guidelines: results from user testing of the BMJ Rapid Recommendations in primary care
Source: HighWire-hosted journal article supplement (doi:10.1136/bmjopen-2023-071847), 2023-11-01

## RAPID RECOMMENDATIONS

## Visual summary of recommendation

## Population

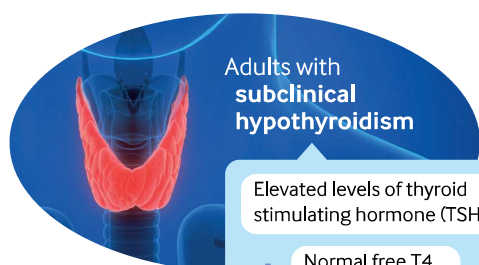

## Including:

- ✓ Patients with no symptoms (diagnosed after screening)
- ✓ Patients with non-specific symptoms

## May not apply to:

- ? Patients with severe symptoms
- ? Young adults (such as <30 years)

## Does not apply to:

- ✗ Women who are or trying to become pregnant
- ✗ Patients with TSH above 20 mIU/L

## Interventions compared

## No thyroid hormones

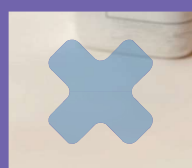

or

Thyroid hormones  
Levothyroxine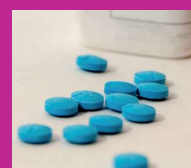

## Recommendation

Strong

Weak

Weak

Strong

We recommend against thyroid hormone therapy for patients with subclinical hypothyroidism

## Key practical issues

## No thyroid hormones

Regular visits and blood samples to monitor progression or resolution

## Thyroid hormones

Long-term regular visits and blood samples to monitor hormone levels

Daily oral medication, normally tablets, often long-term treatment

Overdosage can lead to hyperthyroidism symptoms

Should be taken 4 hours apart from any products containing calcium or iron

## TSH levels and symptoms

TSH levels may vary with stress, transient disease or with age. Elevated levels thus often revert to normal without treatment

There is no clear evidence on how to reliably attribute symptoms to subclinical hypothyroidism

## Values and preferences

The panel expects little variability in how patients weigh the lack of benefit against the possible harms

Potential harms, and in particular risk of dying, may be valued differently by patients depending on their age, quality of life and comorbidities

## RAPID RECOMMENDATIONS

## Comparison of benefits and harms

## For the elderly - about 65 years and older

Includes all the evidence, including from the largest TRUST trial conducted among an elderly population with comorbidities (see Figure 2)

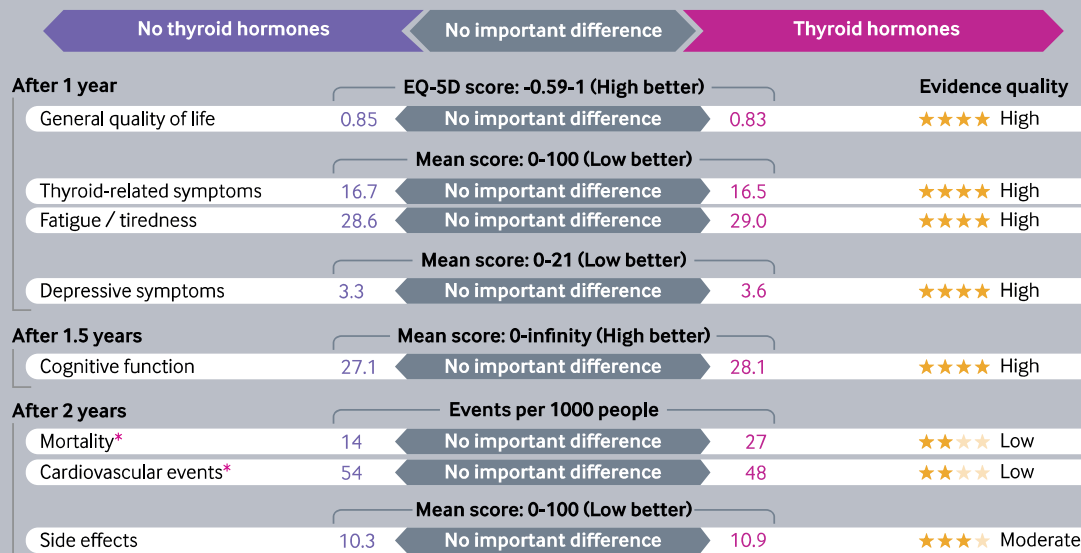

## For younger people (such as 65 and younger)

The results of the systematic review were dominated by the large TRUST trial, conducted among the elderly. Therefore, the panel examined the evidence without this trial whenever possible. However, TRUST was the only study reporting on harms.

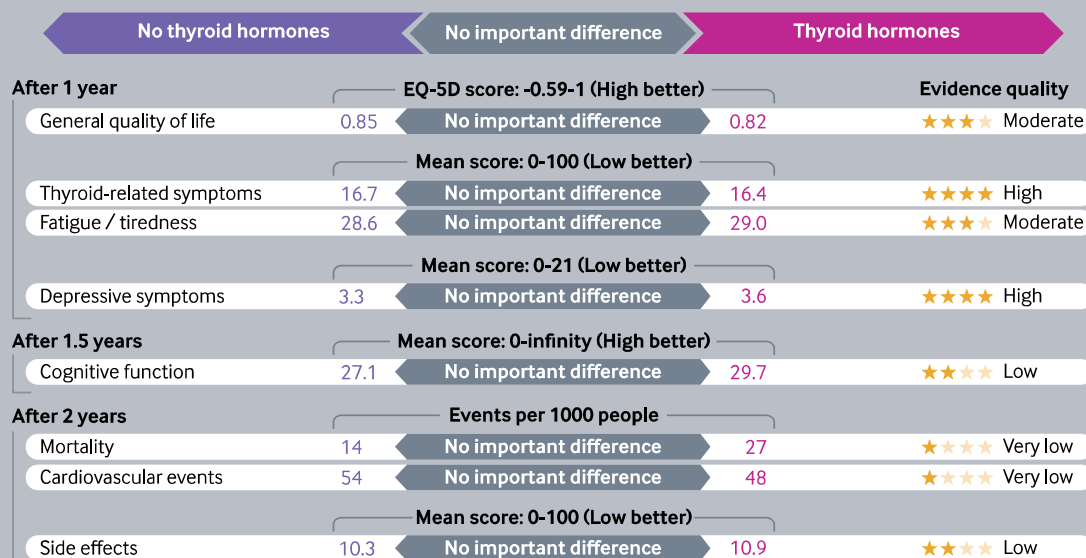

\* Only a few deaths were observed, in a single trial. For mortality, we are 95% confident that the difference is between 5 fewer to 62 more deaths per 1000 patients taking levothyroxine. For cardiovascular events, we are 95% confident that the difference is between 28 fewer to 62 more events per 1000 patients taking levothyroxine

RAPID RECOMMENDATIONS

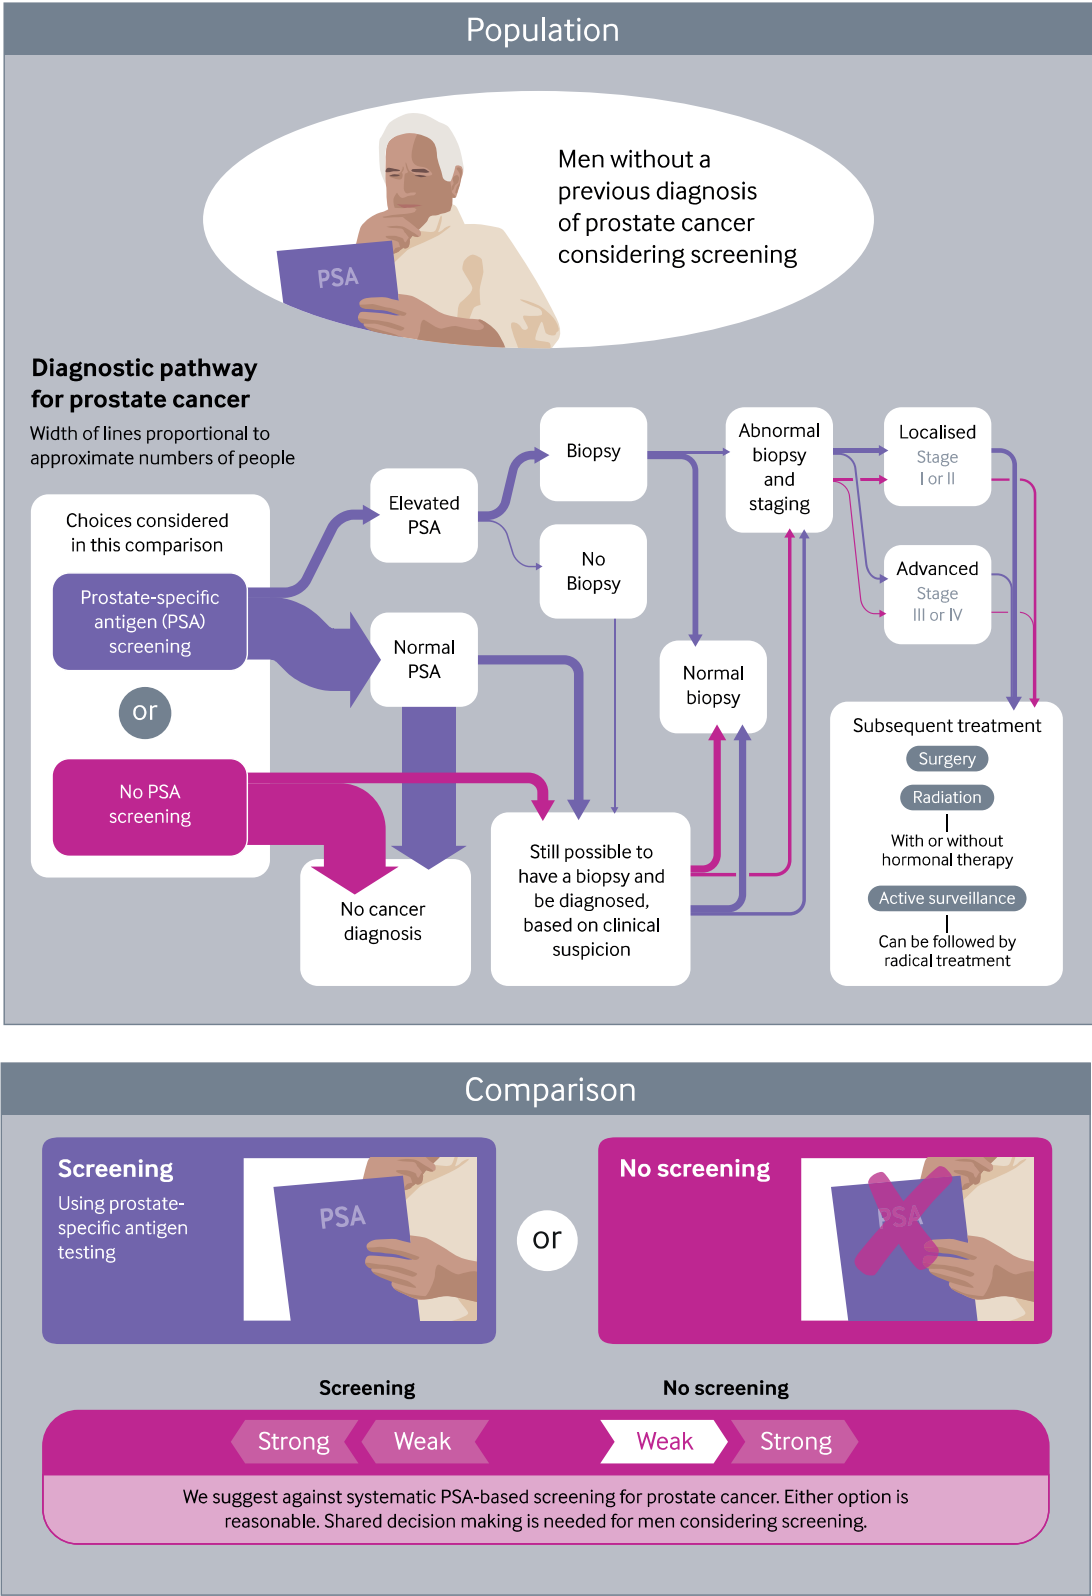

BMJ: first published as 10.1136/bmj.k3581 on 5 September 2018. Downloaded from <http://www.bmj.com/> on 6 December 2022 by guest. Protected by copyright.

Disclaimer: This infographic is not a validated clinical decision aid. This information is provided without any representations, conditions or warranties that it is accurate or up to date. BMJ and its licensors assume no responsibility for any aspect of treatment administered with the aid of this information. Any reliance placed on this information is strictly at the user's own risk. For the full disclaimer wording see BMJ's terms and conditions: <http://www.bmj.com/company/legal-information/>

RAPID RECOMMENDATIONS

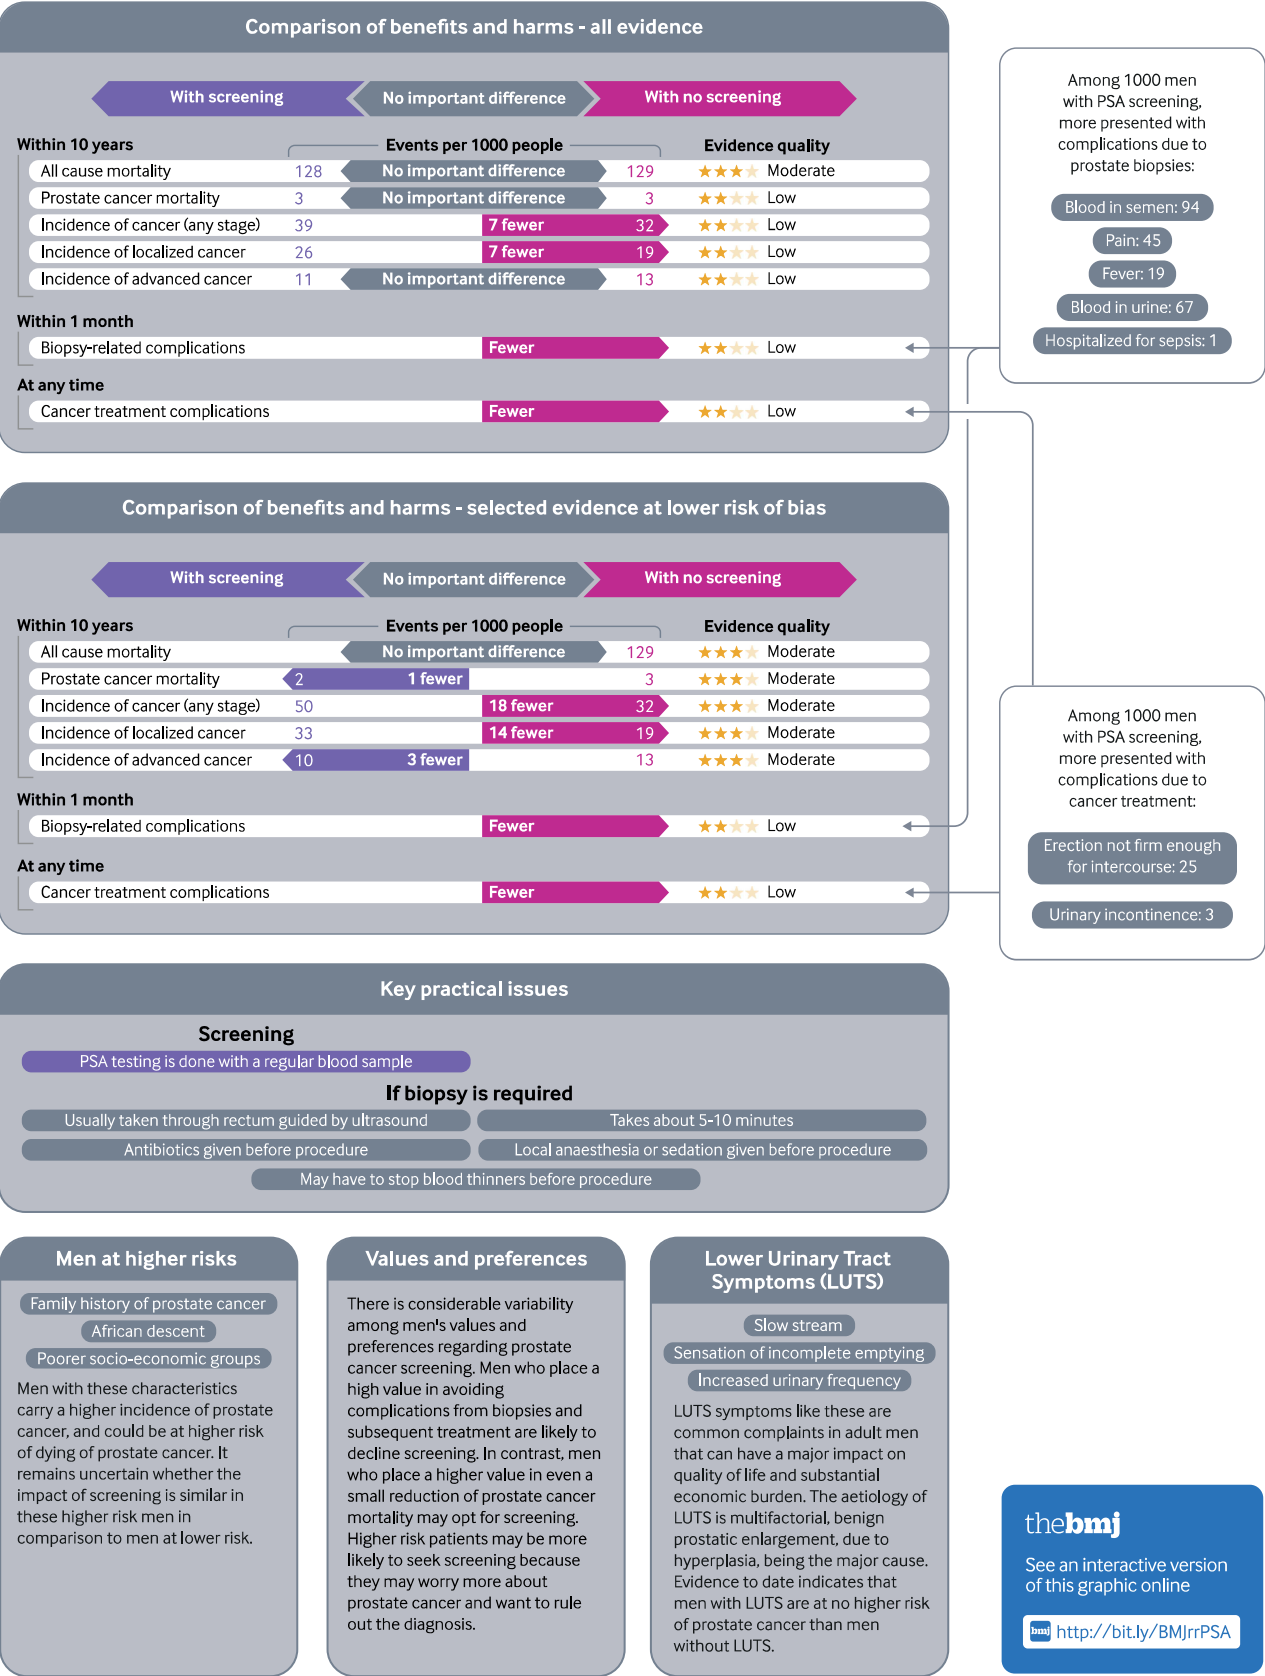

## RAPID RECOMMENDATIONS

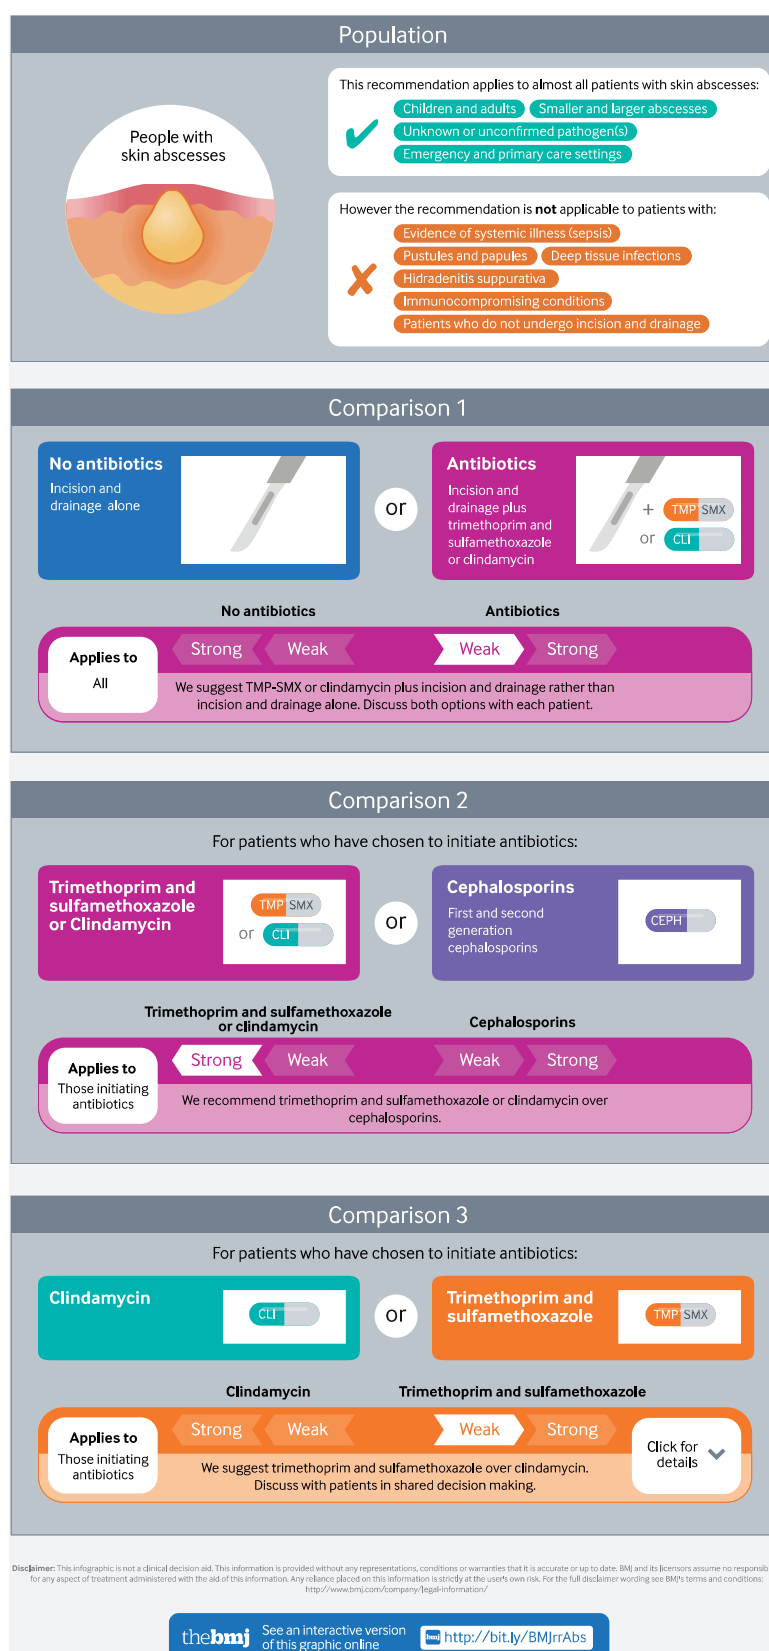

BMJ: first published as 10.1136/bmj.k243 on 6 February 2018. Downloaded from <http://www.bmj.com/> on 6 December 2022 by guest. Protected by copyright.

RAPID RECOMMENDATIONS

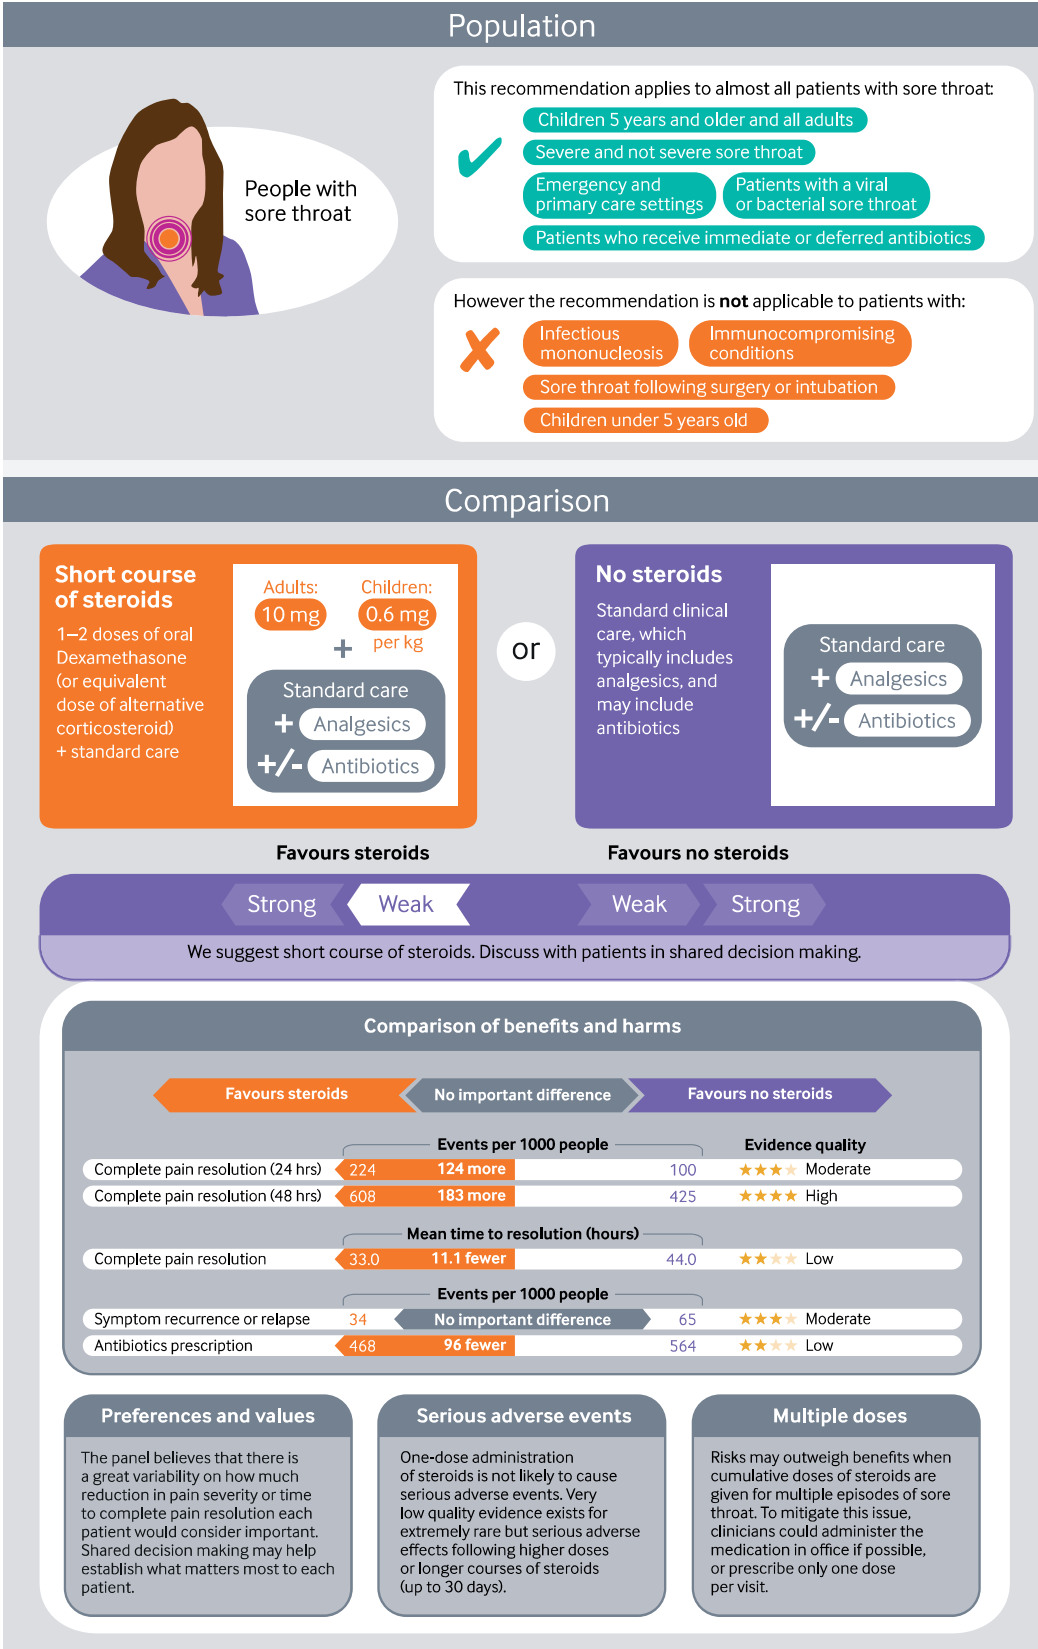

BMJ: first published as 10.1136/bmj.4090 on 20 September 2017. Downloaded from <http://www.bmj.com/> on 6 December 2022 by guest. Protected by copyright.

## RAPID RECOMMENDATIONS

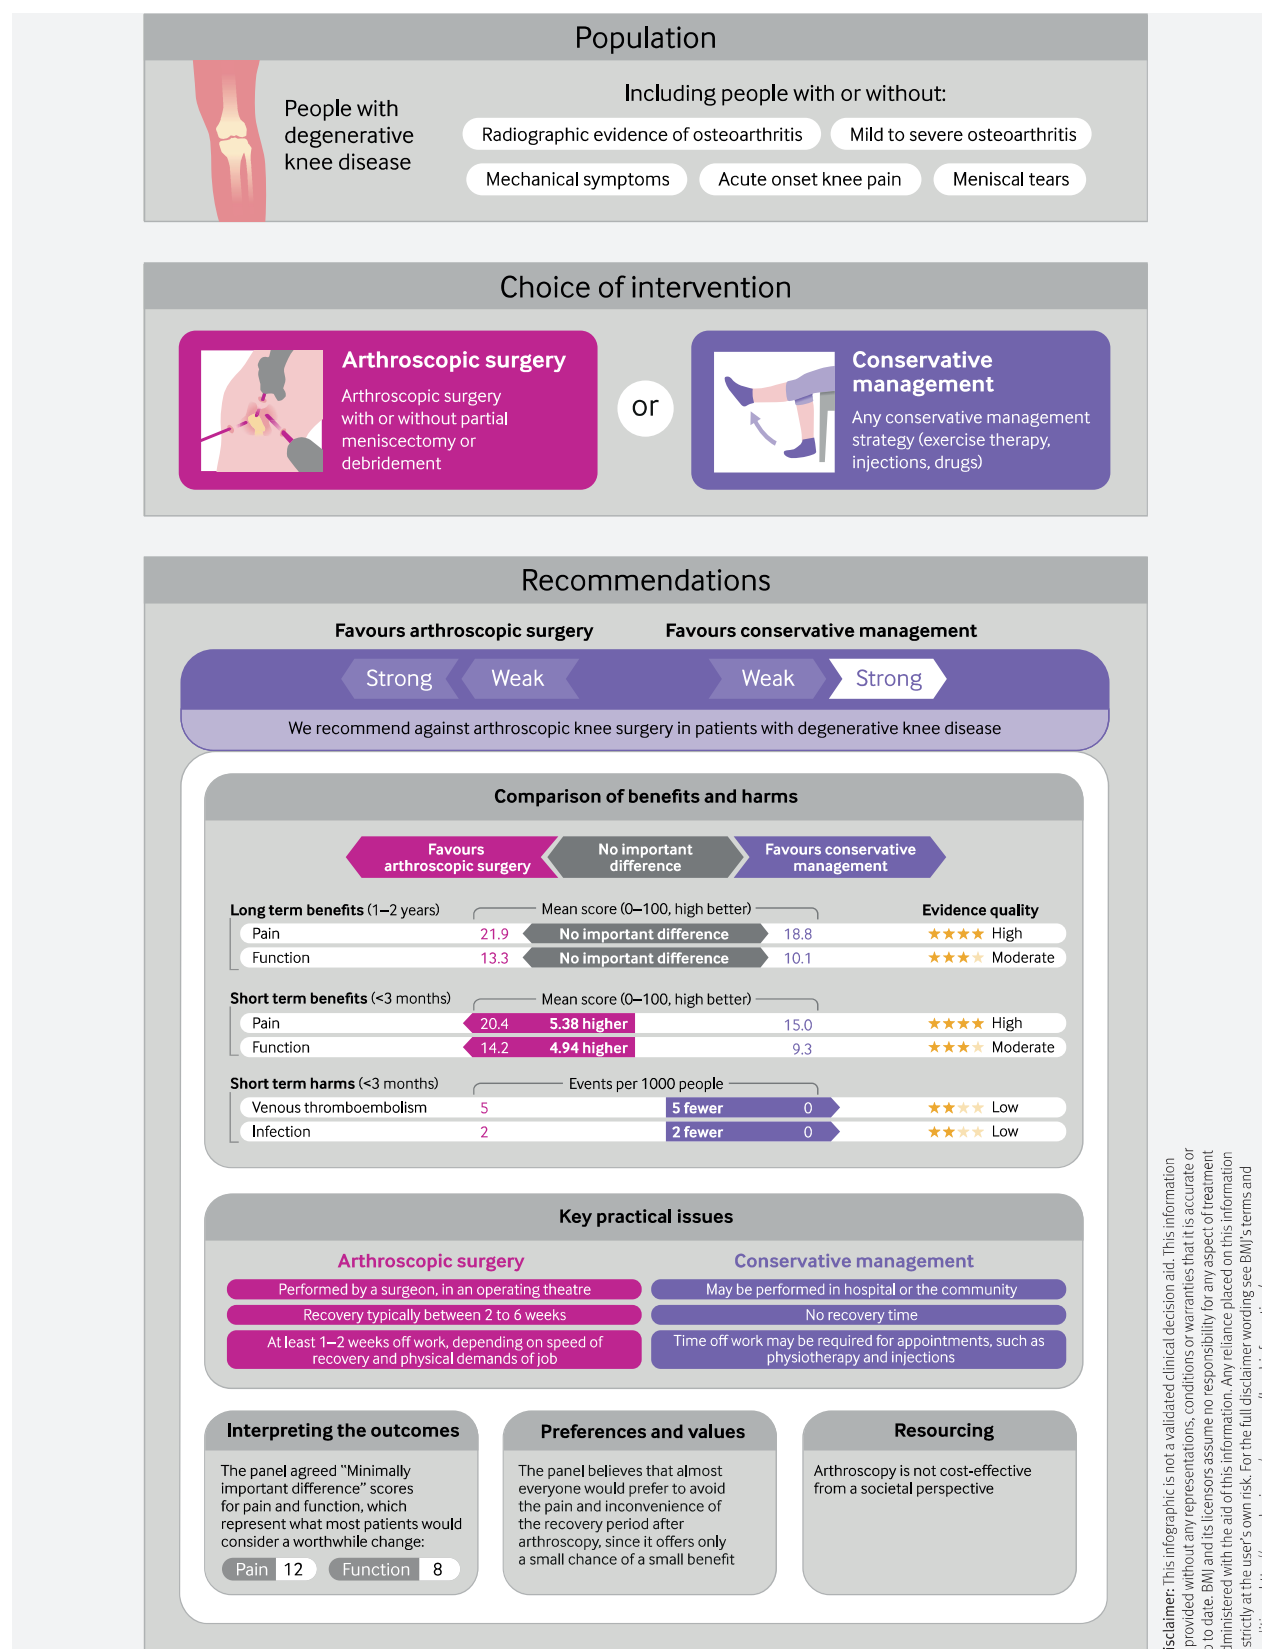

Supplement: bmjopen-2023-071847supp001_data_supplement.pdf [file bmjopen-2023-071847supp001_data_supplement.pdf]
