# Supplementary material for: Infographic summaries for clinical practice guidelines: results from user testing of the BMJ Rapid Recommendations in primary care
Source: HighWire-hosted journal article supplement (doi:10.1136/bmjopen-2023-071847), 2023-11-01
Supplement: bmjopen-2023-071847supp002_data_supplement.pdf [file bmjopen-2023-071847supp002_data_supplement.pdf]

Visuele samenvatting van de richtlijn

Populatie



**Volwassenen met subklinische hypothyroïdie**

Verhoogde spiegels van thyroid stimulerend hormoon (TSH)

+ Normale spiegels vrij T4 (thyroxine)

**Inclusief:**

- ✓ Patiënten zonder symptomen (gediagnosticeerd na screening)
- ✓ Patiënten met niet-specifieke symptomen

**Is mogelijk niet van toepassing op:**

- ? Patiënten met ernstige symptomen
- ? Jongvolwassenen (< 30 jaar)

**Geldt niet voor:**

- ✗ Vrouwen die zwanger zijn of proberen te worden
- ✗ Patiënten met TSH > 20 mIU/L

Vergeleken interventies

**Geen schildklierhormonen**



**Schildklierhormonen (Levothyroxine)**



OF

Aanbeveling

Sterk

Zwak

Zwak

Sterk

We adviseren tegen schildklierhormoontherapie voor patiënten met subklinische hypothyroidie

More details

Vergelijking van voor- en nadelen

| Voor ouderen – 65 jaar en ouder                                                                                                           |      |                          |  |                     |       |                             |
|-------------------------------------------------------------------------------------------------------------------------------------------|------|--------------------------|--|---------------------|-------|-----------------------------|
| Omvat alle evidentie, inclusief de data van de grootste TRUST trial uitgevoerd op een oudere populatie met comorbiditeiten (zie Figuur 2) |      |                          |  |                     |       |                             |
| Geen schildklierhormonen                                                                                                                  |      | Geen belangrijk verschil |  | Schildklierhormonen |       |                             |
| Na 1 jaar                                                                                                                                 |      |                          |  |                     |       |                             |
| EQ-5D score: -059 - 1 (Hoog beter)                                                                                                        |      |                          |  |                     |       |                             |
| Algemene kwaliteit van leven                                                                                                              | 0.85 | Geen belangrijk verschil |  | 0.83                | ★★★★★ | Evidentie kwaliteit<br>Hoog |
| Gemiddelde score: 0 - 100 (Laag beter)                                                                                                    |      |                          |  |                     |       |                             |
| Schildklier gerelateerde symptomen                                                                                                        | 16.7 | Geen belangrijk verschil |  | 16.5                | ★★★★★ | Hoog                        |
| Vermoeidheid/moeheid                                                                                                                      | 28.6 | Geen belangrijk verschil |  | 29.0                | ★★★★★ | Hoog                        |
| Gemiddelde score: 0 - 21 (Laag beter)                                                                                                     |      |                          |  |                     |       |                             |
| Depressieve symptomen                                                                                                                     | 3.3  | Geen belangrijk verschil |  | 3.6                 | ★★★★★ | Hoog                        |
| Na 1,5 jaar                                                                                                                               |      |                          |  |                     |       |                             |
| Gemiddelde score: 0 - oneindig (Hoog beter)                                                                                               |      |                          |  |                     |       |                             |
| Cognitieve functies                                                                                                                       | 27.1 | Geen belangrijk verschil |  | 28.1                | ★★★★★ | Hoog                        |
| Na 2 jaar                                                                                                                                 |      |                          |  |                     |       |                             |
| Events per 1000 personen                                                                                                                  |      |                          |  |                     |       |                             |
| Mortaliteit                                            | 14   | Geen belangrijk verschil |  | 27                  | ★★★★★ | Laag                        |
| Cardiovasculaire events                                | 54   | Geen belangrijk verschil |  | 48                  | ★★★★★ | Laag                        |
| Gemiddelde score: 0 - 100 (Laag beter)                                                                                                    |      |                          |  |                     |       |                             |
| Nevenwerkingen                                                                                                                            | 10.3 | Geen belangrijk verschil |  | 10.9                | ★★★★★ | Matig                       |

⚠ Slechts enkele overlijdens werden opgemerkt, in een enkele trial. Voor mortaliteit zijn we 95% zeker dat het verschil is tussen 5 minder tot 62 meer sterfgevallen per 1000 patiënten die levothyroxine gebruiken. Voor cardiovasculaire events zijn we 95% zeker dat het verschil is tussen 28 minder tot 62 meer events per 1000

Voor jongere personen (zoals 65 jaar en jonger)

De resultaten van de systematic review werden gedomineerd door de grote TRUST trials, uitgevoerd bij ouderen. Hierom onderzocht het panel de evidentie zonder deze trial wanneer mogelijk. TRUST was echter wel de enige studie die schade vermeldde.

| Geen schildklierhormonen                    |      | Geen belangrijk verschil |  | Schildklierhormonen |                 |
|---------------------------------------------|------|--------------------------|--|---------------------|-----------------|
| Na 1 jaar                                   |      |                          |  |                     |                 |
| EQ-5D score: -059 - 1 (Hoog beter)          |      |                          |  |                     |                 |
| Algemene kwaliteit van leven                | 0.85 | Geen belangrijk verschil |  | 0.82                | ★★★★★ Matig     |
| Gemiddelde score: 0 - 100 (Laag beter)      |      |                          |  |                     |                 |
| Schildklier gerelateerde symptomen          | 16.7 | Geen belangrijk verschil |  | 16.4                | ★★★★★ Hoog      |
| Vermoeidheid/moeheid                        | 28.6 | Geen belangrijk verschil |  | 29.0                | ★★★★★ Matig     |
| Gemiddelde score: 0 - 21 (Laag beter)       |      |                          |  |                     |                 |
| Depressieve symptomen                       | 3.3  | Geen belangrijk verschil |  | 3.6                 | ★★★★★ Hoog      |
| Na 1,5 jaar                                 |      |                          |  |                     |                 |
| Gemiddelde score: 0 - oneindig (Hoog beter) |      |                          |  |                     |                 |
| Cognitieve functies                         | 27.1 | Geen belangrijk verschil |  | 29.7                | ★★★★★ Laag      |
| Na 2 jaar                                   |      |                          |  |                     |                 |
| Events per 1000 personen                    |      |                          |  |                     |                 |
| Mortaliteit                                 | 14   | Geen belangrijk verschil |  | 27                  | ★★★★★ Zeer laag |
| Cardiovasculaire events                     | 54   | Geen belangrijk verschil |  | 48                  | ★★★★★ Zeer laag |
| Gemiddelde score: 0 - 100 (Laag beter)      |      |                          |  |                     |                 |
| Nevenwerkingen                              | 10.3 | Geen belangrijk verschil |  | 10.9                | ★★★★★ Laag      |

Belangrijkste praktische problemen

**Geen schildklierhormonen**

Regelmatige bezoeken en bloedstalen om progressie of resolutie te monitoren

**Schildklierhormonen**

Op lange termijn regelmatige bezoeken en bloedstalen om hormoonspiegels te monitoren

Dagelijkse orale medicatie, normaal tabletten, vaak langdurige behandeling

Overdosis kan leiden tot symptomen van hyperthyroidie

Zou 4u ingenomen moeten worden voor producten die calcium of ijzer bevatten

**TSH spiegels en symptomen**

TSH spiegels kunnen variëren met stress, voorbijgaande ziekte of met de leeftijd. Verhoogde spiegels worden dus vaak terug normaal zonder behandeling.

Er is geen duidelijke evidentie hoe de symptomen betrouwbaar kunnen worden toegeschreven aan subklinische hypothyroidie

**Waarden en voorkeuren**

Het panel verwacht weinig variabiliteit in hoe patiënten het gebrek aan voordeel afwegen tegen mogelijke nadelen.

Mogelijke nadelen, en met name het risico op overlijden, kan door patiënten anders worden gewaardeerd afhankelijk van hun leeftijd, kwaliteit van leven en comorbiditeiten.



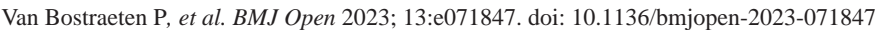



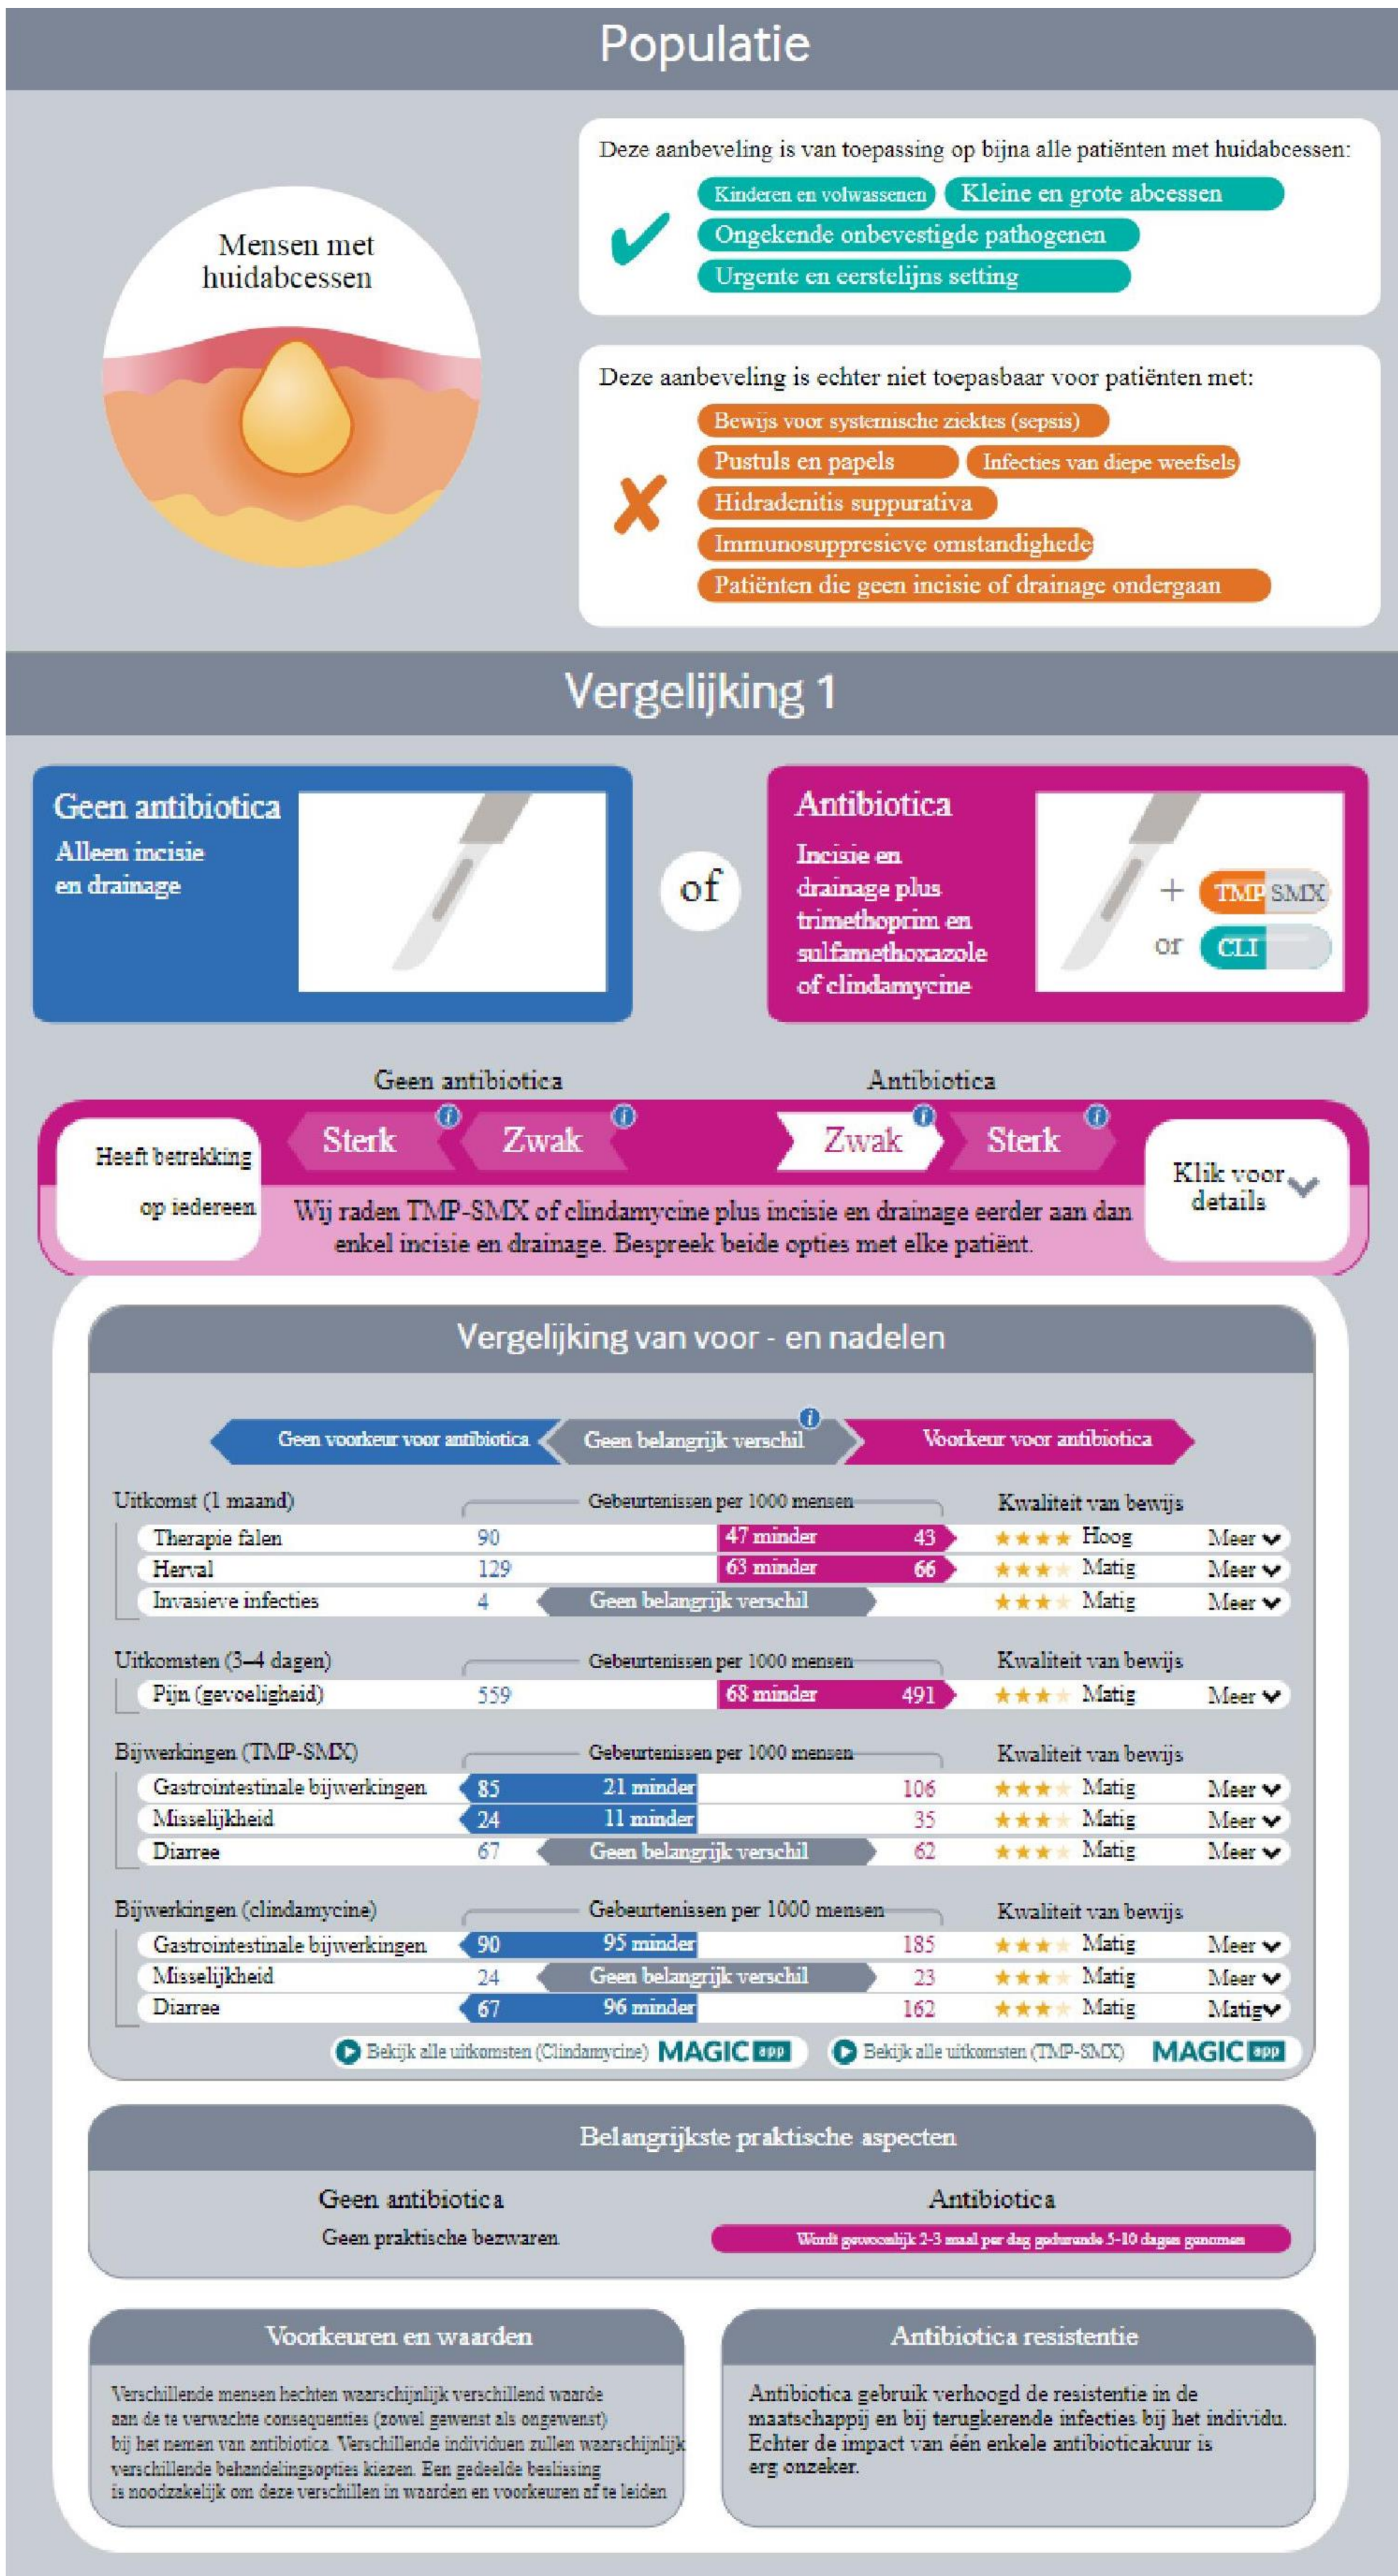



Populatie



Mensen met keelpijn

Deze aanbeveling geldt voor zo goed als alle patiënten met keelpijn:

✓

Kinderen en volwassenen

Ernstige en niet-ernstige keelpijn

Spoed- en eerstelijnszorginstellingen

Patiënten met virale of bacteriële keelpijn

Patiënten die onmiddellijk of uitgesteld antibiotica krijgen

Desondanks geldt de aanbeveling niet voor patiënten met:

✗

Infectieuze mononucleose

Immuuncompromitterende aandoeningen

Keelpijn volgend op heelkunde of intubatie

Keuze van interventie

**Korte kuur met steroïden**

1-2 dosissen van oraal Dexamethasone (of equivalente dosis van een alternatief corticosteroid) + standaard zorgen

Volwassenen 10mg

Kinderen 0.6mg per kg

+

Standaard zorgen

+ Analgetica

+/- Antibiotica

OF

**Geen steroïden**

Standaard klinische zorgen, dewelke typisch analgetica bevatten en mogelijks ook antibiotica bevatten.

Standaard zorgen

+ Analgetica

+/- Antibiotica

Aanbeveling

**Geldt voor: iedereen**

Sterk

Zwak

Zwak

Sterk

Wij stellen een korte kuur steroïden voor. Overleg met de patient in gedeelde besluitvorming.

Vergelijking van de voor- en nadelen

|                                           | Geeft voorkeur aan steroïden | Geen belangrijke verschillen | Geeft geen voorkeur aan steroïden | Kwaliteit van evidentie |
|-------------------------------------------|------------------------------|------------------------------|-----------------------------------|-------------------------|
| <b>Gevallen per 1000 mensen</b>           |                              |                              |                                   |                         |
| Volledig verdwijnen pijn (24u)            | 224                          | 124 meer                     | 100                               | ★★★★ Gemiddeld          |
| Volledig verdwijnen pijn (24u)            | 629                          | 204 meer                     | 425                               | ★★★★ Hoog               |
| <b>Gemiddelde tijd tot verdwijnen (u)</b> |                              |                              |                                   |                         |
| Volledig verdwijnen pijn                  | 33.0                         | 11.1 minder                  | 44.0                              | ★★★★ Laag               |
| <b>Gevallen per 1000 mensen</b>           |                              |                              |                                   |                         |
| Herval van symptomen of recidief          | 34                           | Geen belangrijk verschil     | 65                                | ★★★★ Gemiddeld          |
| Antibiotica voorschrift                   | 468                          | 96 minder                    | 564                               | ★★★★ Laag               |

Belangrijke praktische zaken

**Steroïden**

1-2 dosissen, ingenomen als pil(len) of intramusculaire injecties

Kan transiënte slaapverstoring veroorzaken, alsook prikkelbaarheid

Dexamethasone wordt algemeen gemeden tijdens de zwangerschap

**Geen steroïden**

Geen praktische zaken

**Voorkeuren en waarden**

Het panel gelooft dat er een grote variabiliteit is in hoeveel reductie in ernst van de pijn of tijd er nodig is voor volledig verdwijnen van de pijn voor de patiënt als belangrijk wordt ervaren. Gedeelde besluitvorming zou kunnen helpen bewerkstelligen waar elke patiënt het meeste belang aan hecht.

**Ernstige nevenwerkingen**

Toediening van een enkele dosis steroïden zal niet waarschijnlijk ernstige nevenwerkingen veroorzaken. Er bestaat evidentie van zeer lage kwaliteit voor uiterst zeldzame maar ernstige nevenwerkingen volgend op hogere dosissen of langere kuren steroïden (tot 30 dagen).

**Meerdere dosissen**

De risico's zouden kunnen de voordelen overtreffen wanneer cumulatieve dosissen steroïden gegeven worden voor meerdere episodes van keelpijn. Om dit probleem te verzachten, kunnen artsen de medicatie toedienen op de praktijk zo mogelijk of enkel 1 dosis voorschrijven per bezoek.

Van Bostraeten P, et al. BMJ Open 2023; 13:e071847. doi: 10.1136/bmjopen-2023-071847

Populatie



Mensen met degeneratieve knieproblemen

Inclusief mensen met of zonder:

Radiografisch bewijs van osteoarthritis

Matige tot ernstige osteoartritis

Mechanische symptomen

Acuut onstane kniepijn

Meniscusruptuur

Keuze van interventie



Arthroscopie  
Atroscopische ingreep met of zonder partiële meniscectomie of debridement

Of



Conservatief beleid  
Alle conservatieve behandelingsopties (oefentherapie, injecties, medicatie)

Aanbevelingen

Voorkeur voor artroscopie

Voorkeur voor conservatief beleid

Toepasbaar op iedereen

Sterk

Zwak

Zwak

Sterk

We pleiten tegen het gebruik van artroscopie bij patiënten met degeneratieve knieproblemen

Vergelijking van voor- en nadelen

|                                                | Voorkeur voor artroscopie | Geen belangrijk verschil  | Voorkeur voor conservatief beleid | Kwaliteit bewijs |
|------------------------------------------------|---------------------------|---------------------------|-----------------------------------|------------------|
| <b>Lange termijn voordelen (1-2 jaar)</b>      |                           |                           |                                   |                  |
| Pijn                                           | 21,9                      | Geen significant verschil | 18.8                              | ★★★★ Hoog        |
| Functie                                        | 13,3                      | Geen significant verschil | 10.1                              | ★★★★ Gemiddeld   |
| <b>Korte termijn voordelen (&lt;3 maanden)</b> |                           |                           |                                   |                  |
| Pijn                                           | 20,4                      | 5,38 hoger                | 15.0                              | ★★★★ Hoog        |
| Functie                                        | 14,2                      | 4,94 hoger                | 9.3                               | ★★★ Gemiddeld    |
| <b>Korte termijn nadelen (&lt;3 maanden)</b>   |                           |                           |                                   |                  |
| Number of pain episodes                        | 5                         | 5 minder                  | 0                                 | ★★★★ Laag        |
| Number of pain episodes                        | 2                         | 2 minder                  | 0                                 | ★★★★ Laag        |

Kernboodschappen

Artroscopie

Uitgevoerd door chirurg in operatiekamer

Herstelperiode tussen 2-6 weken

Minstens 1-2 weken arbeidsongeschikt, afhankelijk van revalidatie en fysieke belasting werk

Conservatief beleid

Kan zowel in ziekenhuis als daarbuiten

Geen herstelperiode

Afwezigheid op het werk o.w.v. afspraken voor oefentherapie of injecties

Voorkeuren en waarden

Het panel is van mening dat bijna iedereen zou verkiezen om de pijn en het ongemak gedurende de revalidatieperiode na artroscopie te vermijden, aangezien dit slechts een kleine kans op een klein voordeel biedt.

Gebruik van middelen

Vanuit een maatschappelijk standpunt is artroscopie niet kosten-efficiënt.

Van Bostraeten P, et al. BMJ Open 2023; 13:e071847. doi: 10.1136/bmjopen-2023-071847
